# Supplementary material for: Mitochondrial growth during the cell cycle of Trypanosoma brucei bloodstream forms
Source: PubMed Central journal article supplement (PMC5118809; doi:10.1038/srep36565), 2016-11-22
Supplement: srep36565-s1.pdf [file srep36565-s1.pdf]

## Supplementary Information

Mitochondrial growth during the cell cycle of *Trypanosoma brucei* bloodstream forms

**Martin Jakob<sup>1</sup>, Anneliese Hoffmann<sup>1,3</sup>, Simona Amodeo<sup>1,3</sup>, Camille Peitsch<sup>2,3</sup>, Benoît Zuber<sup>2</sup>, Torsten Ochsenreiter<sup>1\*</sup>**

<sup>1</sup>Institute of Cell Biology, University of Bern, Switzerland <sup>2</sup>Institute of Anatomy, University of Bern, Switzerland <sup>3</sup>Graduate School for Cellular and Biomedical Sciences, University of Bern, Switzerland  
\*Correspondence to: [torsten.ochsenreiter@izb.unibe.ch](mailto:torsten.ochsenreiter@izb.unibe.ch)

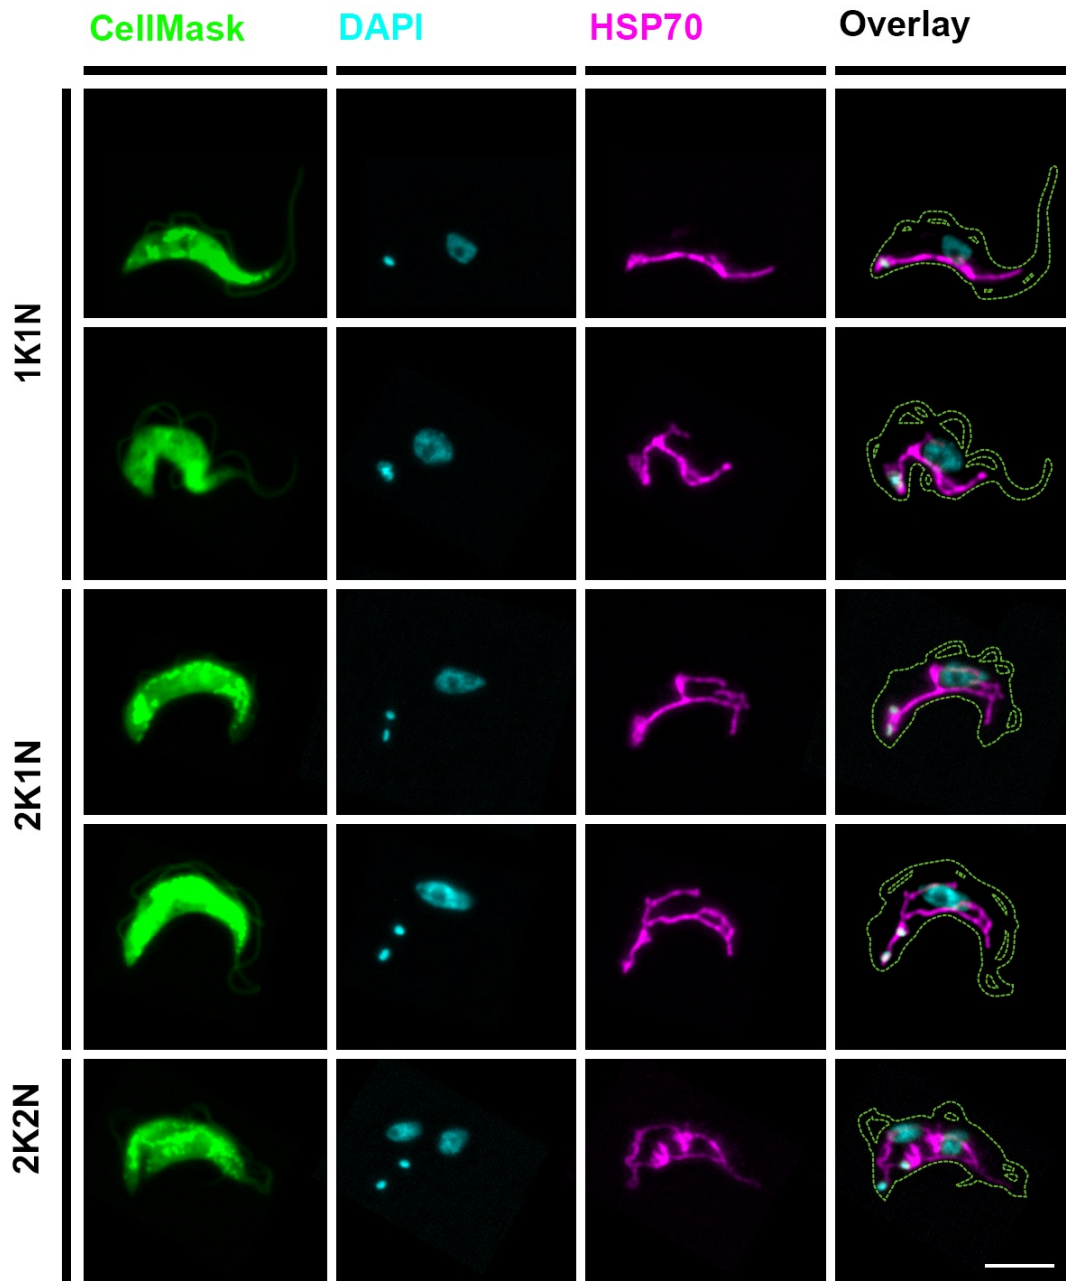

**Supplementary Fig. 1 | Epifluorescence microscopy images of BSF *T. brucei* cells stained for the cell body (HSC CellMask), the DNA (DAPI), and the mitochondrion (mtHSP70). Morphologies of the cell body, DNA and the mitochondrial organelle during the cell cycle as observed by epifluorescence microscopy. Green, cell stained by HSC CellMask; cyan, DNA stained by DAPI; and magenta, mitochondrial matrix stained using anti-mtHSP70 antibodies. (Scale bar 5  $\mu\text{m}$ )**

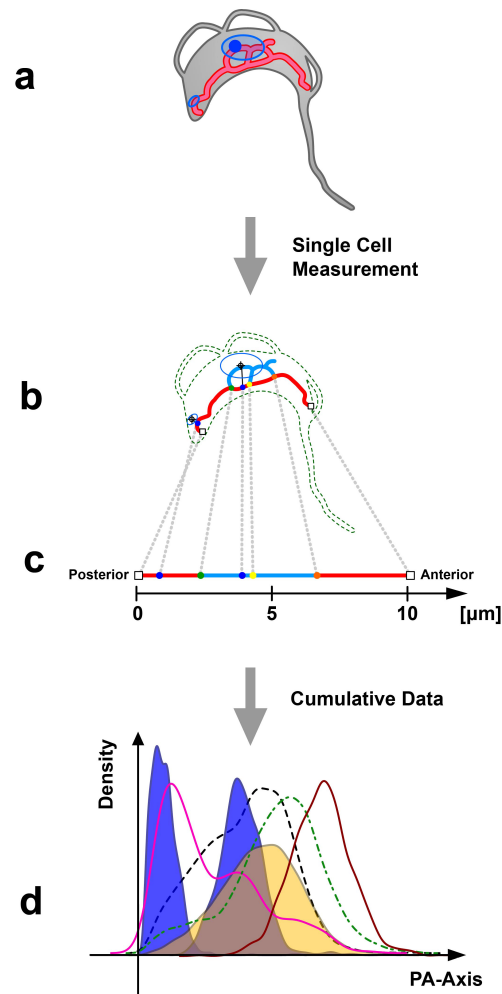

**Supplementary Fig. 2 | Schematic representation of the methodology used for the measurements.** Images of cells are acquired with an epifluorescent microscope and single cells are recognised. (a) Red depicts the mitochondrion, blue the kDNA and nucleus and grey the cell body and flagellum. (b,c) The main mitochondrial branch is shown in red. Outgrowth is highlighted in blue. The dashed line shows the cell body. (b) A variety of features are extracted for each signal. The centre points of the kinetoplasts and the nuclei are projected onto the mitochondrial main branch according to the shortest Euclidean distance to any point on the main branch. (c) The distances from the posterior tip of the main branch to each event (junction, loop or DNA organelle) are measured. (d) Data from multiple cells are used for the identification of patterns. Absolute distances from the posterior tip to any event are plotted as kernel density estimators (KDE).

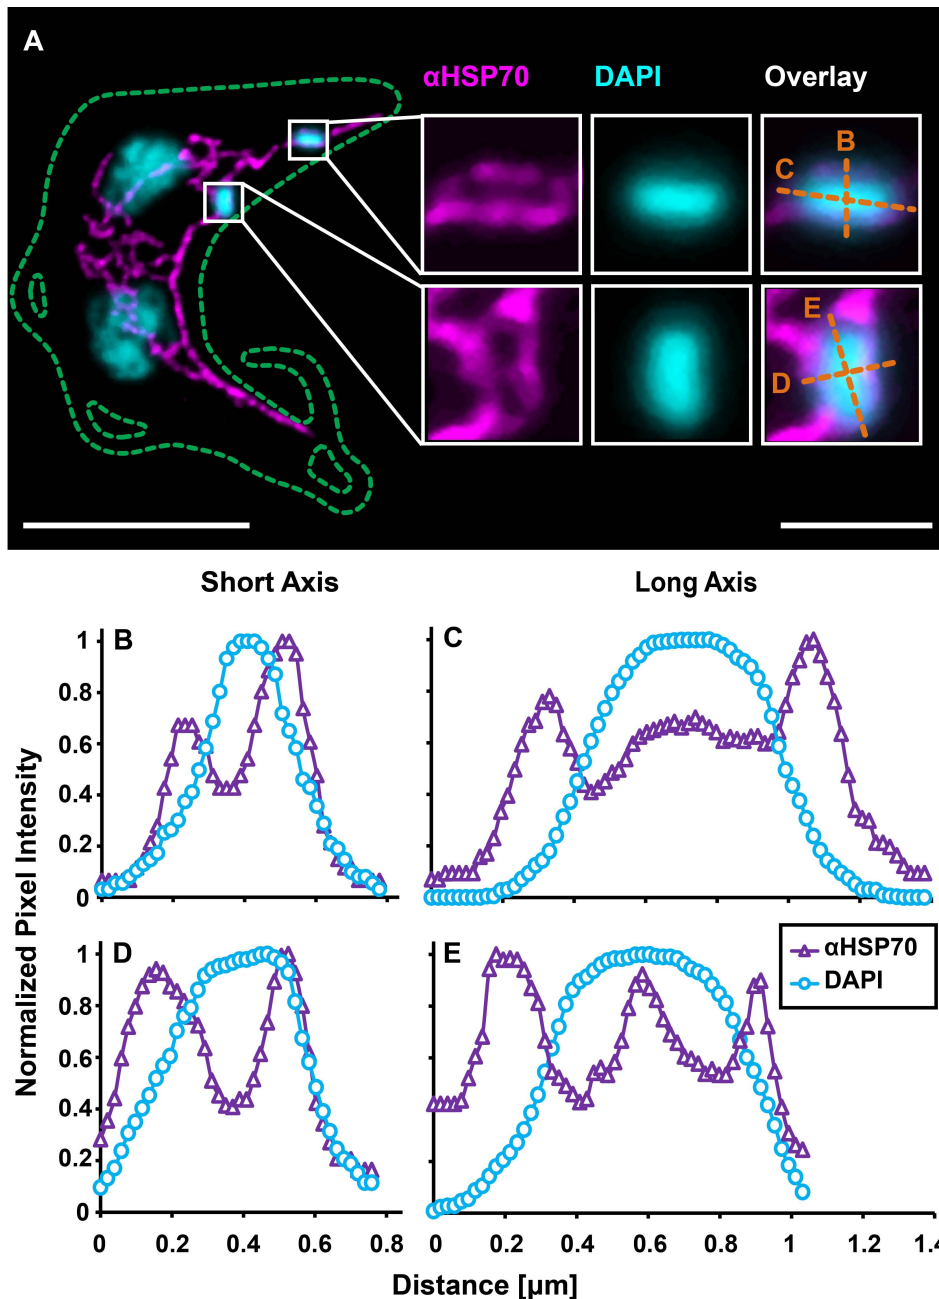

**Supplementary Fig. 3 | The presence of the kinetoplast correlates with the lack of mtHSP70 signal.** Image of a 2K2N cell. (a) The green, dashed line shows the cell outline; the mtHSP70 signal is shown in magenta; DNA stained by DAPI is shown in cyan. The left part shows the cell - the white squares contain the kinetoplasts. The right part shows a magnification of this region for DNA, mtHSP70 and an their overlay. (Left scale bar 5  $\mu$ m, right scale bar 1  $\mu$ m). (b-e) show intensity profiles for DAPI (light-blue) and mtHSP70 (violet). The intensity values are measured as indicated by the dashed, orange lines as shown in (a).

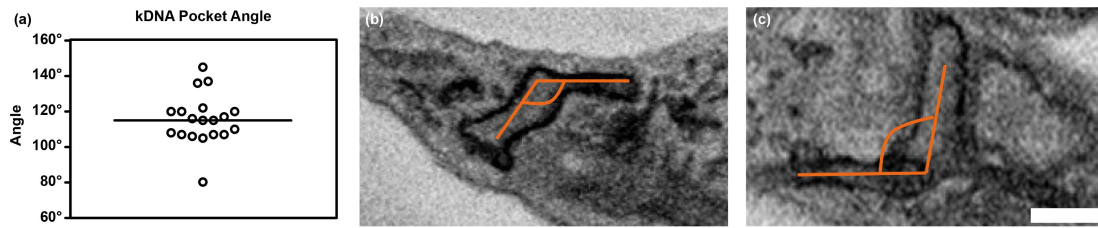

**Supplementary Fig. 4: | Orientation of the kDNA pocket relative to the posterior-anterior axis of the mitochondrion.** (a) Angle measurements from SBFSEM imagery. (b) Representative imagery. n=19. (Scale bar 500 nm)

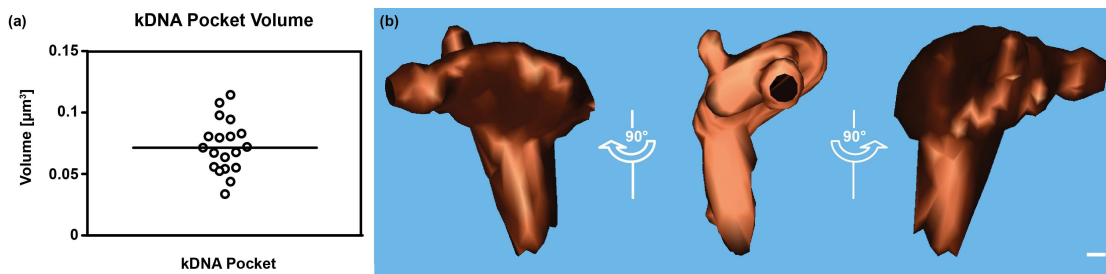

**Supplementary Fig. 5 | 3D rendering of the kDNA pocket and volume measurements.** (a) kDNA pocket volume calculated from 19 reconstructed pocket regions of BSF trypanosomes. (b) Representative kDNA pocket visualization. Anterior of the cell is on top, posterior towards the bottom. (Scale bar 200 nm)

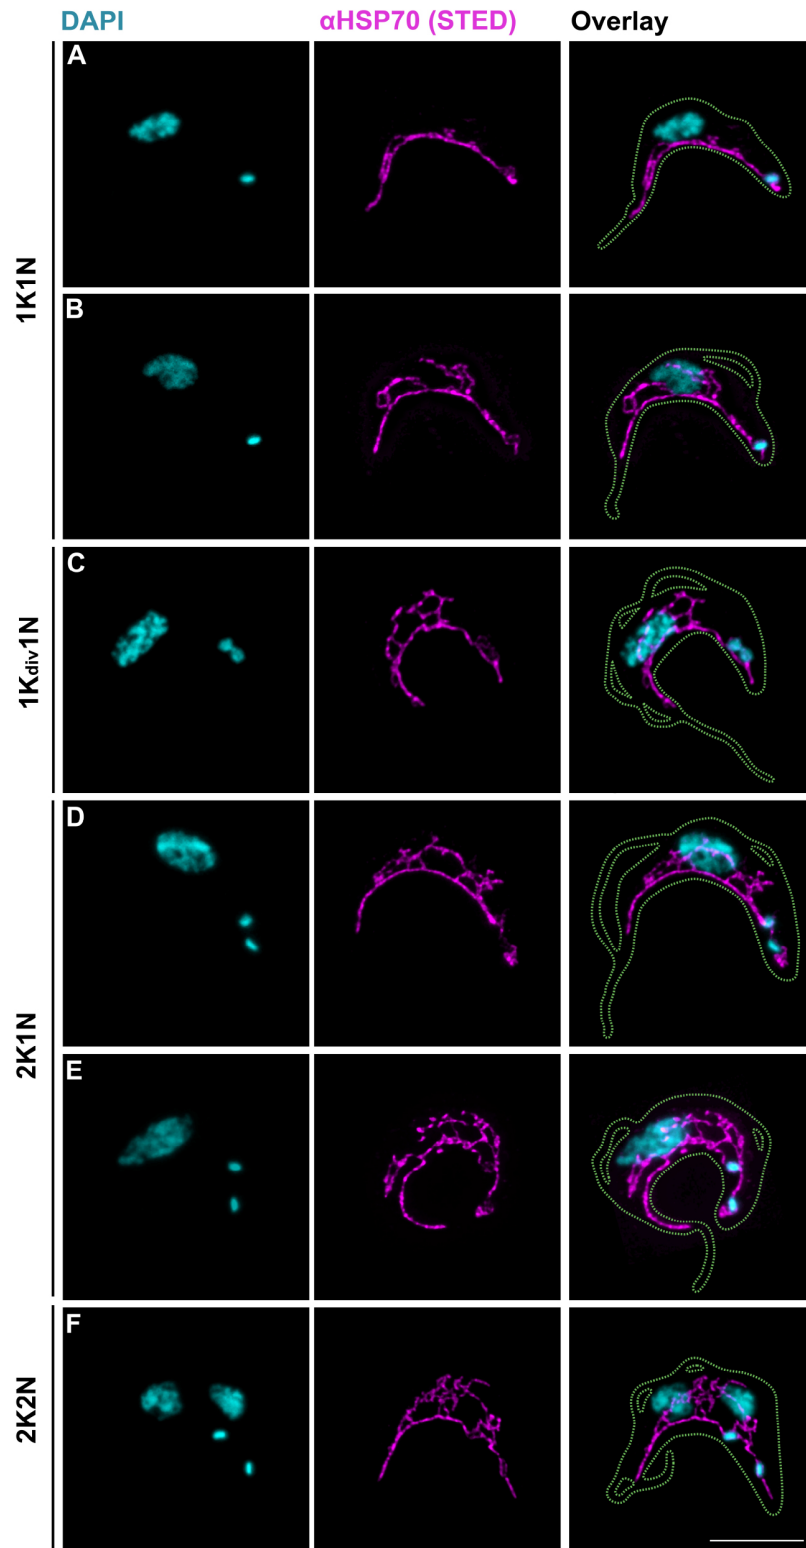

**Supplementary Fig. 6 | Mitochondrial morphologies during the cell cycle as observed by STED microscopy.** The green, dashed lines depict cell outlines; the mtHSP70 signal is shown in magenta; DAPI is shown in cyan. The rows (a-f) show cells in different cell cycle stages. (Scale bar, 5  $\mu$ m).

**Supplementary Table 1 | kDNA pocket measurements.**

| Tube Diameter  |                     |                      |                       |                               |                       |
|----------------|---------------------|----------------------|-----------------------|-------------------------------|-----------------------|
|                | kDNA Pocket<br>[nm] | Constriction<br>[nm] | Mitochondrion<br>[nm] | Volume<br>[ $\mu\text{m}^3$ ] | Angle<br>[ $^\circ$ ] |
|                | 201                 | 71                   | 139                   | 0.067                         | 115                   |
|                | 246                 | 49                   | 129                   | 0.108                         | 80                    |
|                | 248                 | 106                  | 120                   | 0.098                         | 105                   |
|                | 194                 | 86                   | 160                   | 0.054                         | 108                   |
|                | 197                 | 103                  | 156                   | 0.055                         | 116                   |
|                | 242                 | 125                  | 123                   | 0.081                         | 117                   |
|                | 228                 | 85                   | 183                   | 0.044                         | 137                   |
|                | 223                 | 114                  | 151                   | 0.08                          | 107                   |
|                | 193                 | 105                  | 123                   | 0.034                         | 122                   |
|                | 221                 | 127                  | 153                   | 0.056                         | 107                   |
|                | 172                 | 107                  | 141                   | 0.094                         | 110                   |
|                | 219                 | 106                  | 135                   | 0.081                         | 106                   |
|                | 190                 | 155                  | 155                   | 0.052                         | 120                   |
|                | 253                 | 130                  | 136                   | 0.114                         | 115                   |
|                | 188                 | 118                  | 137                   | 0.083                         | 120                   |
|                | 227                 | 135                  | 131                   | 0.071                         | 136                   |
|                | 231                 | 82                   | 157                   | 0.068                         | 120                   |
|                | 191                 | 112                  | 150                   | 0.064                         | 107                   |
|                | 221                 | 177                  | 226                   | 0.072                         | 145                   |
| <i>Median</i>  | 221                 | 107                  | 141                   | 0.071                         | 115                   |
| <i>Q25</i>     | 193.5               | 94.5                 | 133                   | 0.056                         | 107                   |
| <i>Q75</i>     | 229.5               | 126                  | 155.5                 | 0.082                         | 120                   |
| <i>Average</i> | 215                 | 110.158              | 147.632               | 0.072                         | 115.421               |
| <i>SD</i>      | 23.767              | 29.324               | 24.642                | 0.021                         | 14.187                |

| F-Test                        |             |
|-------------------------------|-------------|
| kDNA Pocket vs Constriction   | 0.381056777 |
| Mitochondrion vs Constriction | 0.467811584 |
| kDNA Pocket vs Mitochondrion  | 0.879778634 |

  

| T-Test                        |              |                    |
|-------------------------------|--------------|--------------------|
|                               | p-Value      | Significance Level |
| kDNA Pocket vs Constriction   | 0.0000000000 | ****               |
| Mitochondrion vs Constriction | 0.0001445450 | ***                |
| kDNA Pocket vs Mitochondrion  | 0.0000000003 | ****               |

## Supplementary Table 2 | Mitochondrial diameter from 2D STED imagery

|                | Mito Diameter (XY)<br>[ $\mu\text{m}$ ] | Mito Diameter (Z)<br>[ $\mu\text{m}$ ] |
|----------------|-----------------------------------------|----------------------------------------|
|                | 0.247                                   | 0.656                                  |
|                | 0.35                                    | 0.511                                  |
|                | 0.372                                   | 0.444                                  |
|                | 0.327                                   | 0.387                                  |
|                | 0.307                                   | 0.363                                  |
|                | 0.24                                    | 0.385                                  |
|                | 0.161                                   | 0.706                                  |
|                | 0.277                                   | 0.369                                  |
|                | 0.284                                   | 0.188                                  |
|                | 0.313                                   | 0.296                                  |
|                | 0.386                                   | 0.538                                  |
|                | 0.422                                   | 0.467                                  |
|                | 0.367                                   | 0.376                                  |
|                | 0.339                                   | 0.43                                   |
|                | 0.331                                   | 0.445                                  |
|                | 0.337                                   | 0.528                                  |
|                | 0.197                                   | 0.412                                  |
|                | 0.31                                    | 0.385                                  |
|                | 0.352                                   | 0.263                                  |
|                | 0.508                                   | 0.333                                  |
|                | 0.362                                   | 0.417                                  |
|                | 0.304                                   | 0.467                                  |
|                | 0.319                                   | 0.343                                  |
|                | 0.321                                   |                                        |
|                | 0.279                                   |                                        |
|                | 0.323                                   |                                        |
|                | 0.356                                   |                                        |
|                | 0.261                                   |                                        |
|                | 0.214                                   |                                        |
|                | 0.328                                   |                                        |
|                | 0.283                                   |                                        |
|                | 0.309                                   |                                        |
| <i>Average</i> | 0.315                                   | 0.422                                  |
| <i>SD</i>      | 0.066                                   | 0.116                                  |
| <i>Q25</i>     | 0.282                                   | 0.366                                  |
| <i>Median</i>  | 0.32                                    | 0.412                                  |
| <i>Q75</i>     | 0.351                                   | 0.467                                  |



**Supplementary Table 3 | Mitochondrial volume calculations from 3D STED reconstructions**

|                | 1K1N      |                          |                          | 2K1N      |                          |                          | 2K2N      |                          |                          |
|----------------|-----------|--------------------------|--------------------------|-----------|--------------------------|--------------------------|-----------|--------------------------|--------------------------|
|                | Int. [AU] | Area [ $\mu\text{m}^2$ ] | Vol. [ $\mu\text{m}^3$ ] | Int. [AU] | Area [ $\mu\text{m}^2$ ] | Vol. [ $\mu\text{m}^3$ ] | Int. [AU] | Area [ $\mu\text{m}^2$ ] | Vol. [ $\mu\text{m}^3$ ] |
|                | 6952      | 21.1                     | 2.26                     | 1440      | 32.9                     | 3.83                     | 2378      | 63.1                     | 7.21                     |
|                | 3265      | 19.3                     | 2.18                     | 3134      | 33.3                     | 3.72                     | 2637      | 44.6                     | 4.56                     |
|                | 5233      | 14.6                     | 1.58                     | 2364      | 44                       | 5.1                      | 1383      | 46.3                     | 5.46                     |
|                | 3477      | 21.6                     | 2.32                     |           |                          |                          |           |                          |                          |
|                | 4131      | 31                       | 3.6                      |           |                          |                          |           |                          |                          |
|                | 2844      | 26.4                     | 3.21                     |           |                          |                          |           |                          |                          |
|                | 3063      | 19.8                     | 2.02                     |           |                          |                          |           |                          |                          |
|                | 4503      | 24.6                     | 2.59                     |           |                          |                          |           |                          |                          |
|                | 1499      | 33.2                     | 4.06                     |           |                          |                          |           |                          |                          |
|                | 1732      | 21.4                     | 2.13                     |           |                          |                          |           |                          |                          |
|                | 1803      | 32.2                     | 3.92                     |           |                          |                          |           |                          |                          |
|                | 3342      | 24.7                     | 3.15                     |           |                          |                          |           |                          |                          |
|                | 2351      | 28.8                     | 3.74                     |           |                          |                          |           |                          |                          |
| <i>Average</i> | 3399.615  | 24.515                   | 2.828                    | 2312.667  | 36.733                   | 4.217                    | 2132.667  | 51.333                   | 5.743                    |
| <i>SD</i>      | 1533.64   | 5.598                    | 0.824                    | 848.166   | 6.296                    | 0.767                    | 662.02    | 10.226                   | 1.348                    |
| <i>Q25</i>     | 2351      | 21.1                     | 2.18                     | 1902      | 33.1                     | 3.775                    | 1880.5    | 45.45                    | 5.01                     |
| <i>Median</i>  | 3265      | 24.6                     | 2.59                     | 2364      | 33.3                     | 3.83                     | 2378      | 46.3                     | 5.46                     |
| <i>Q75</i>     | 4131      | 28.8                     | 3.6                      | 2749      | 38.65                    | 4.465                    | 2507.5    | 54.7                     | 6.335                    |
